# Supplementary material for: Paliperidone-loaded spherical solid lipid nanoparticles
Source: Royal Society of Chemistry journal article supplement (doi:10.1039/c4ra03107e), 2014-01-01
Supplement: c4ra03107e1.pdf [file c4ra03107e1.pdf]

ELECTRONIC SUPPLIMETRY INFORMATION

Paliperidone loaded spherical solid lipid nanoparticles

Sacheen Kumar and Jaspreet K. Randhawa\*<sup>†</sup>

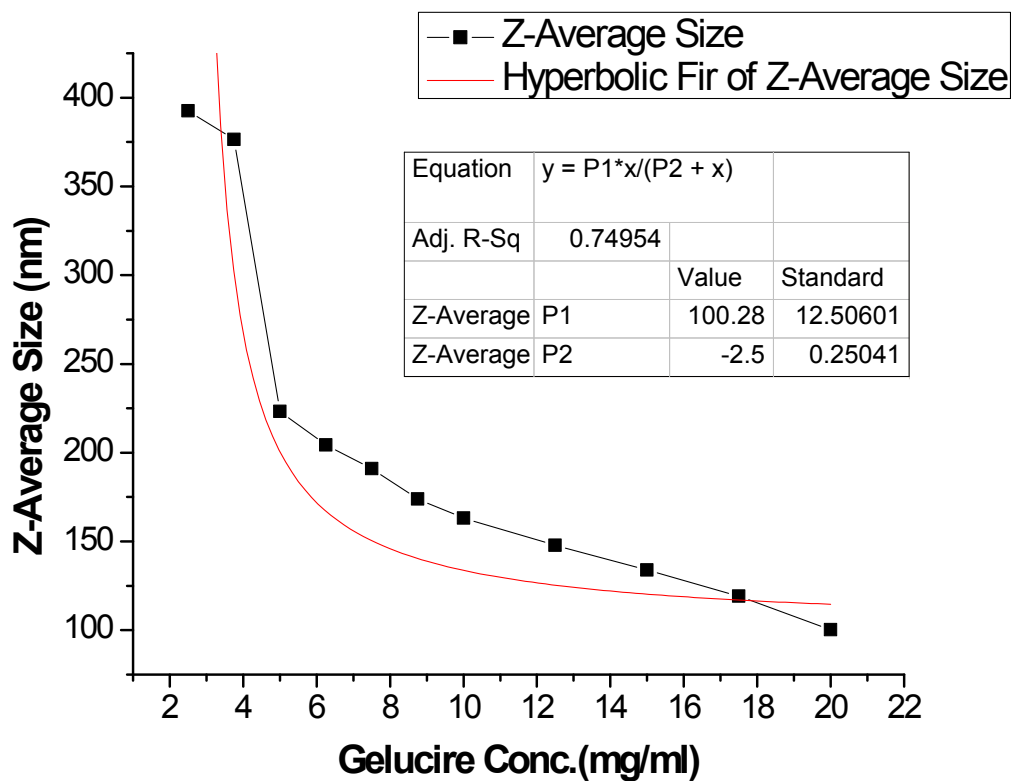

Figure S1. Hyperbolic fit of concentration of Gelucire® 50/13 against Z-average particle size.

The SLNs were prepared from a mixture of 10 mg/ml of Gelucire® 50/13, 10 mg/ml of Capmul® GMS 50K. Paliperidone to lipid ratio was 1:10 in Paliperidone loaded SLNs.

### Results

|                                | Size (d.nm):         | % Intensity | Width (d.n... |
|--------------------------------|----------------------|-------------|---------------|
| <b>Z-Average (d.nm):</b> 135.6 | <b>Peak 1:</b> 214.4 | 93.2        | 177.9         |
| <b>Pdl:</b> 0.404              | <b>Peak 2:</b> 3808  | 5.0         | 1158          |
| <b>Intercept:</b> 0.923        | <b>Peak 3:</b> 23.83 | 1.9         | 3.546         |

Result quality : **Good**

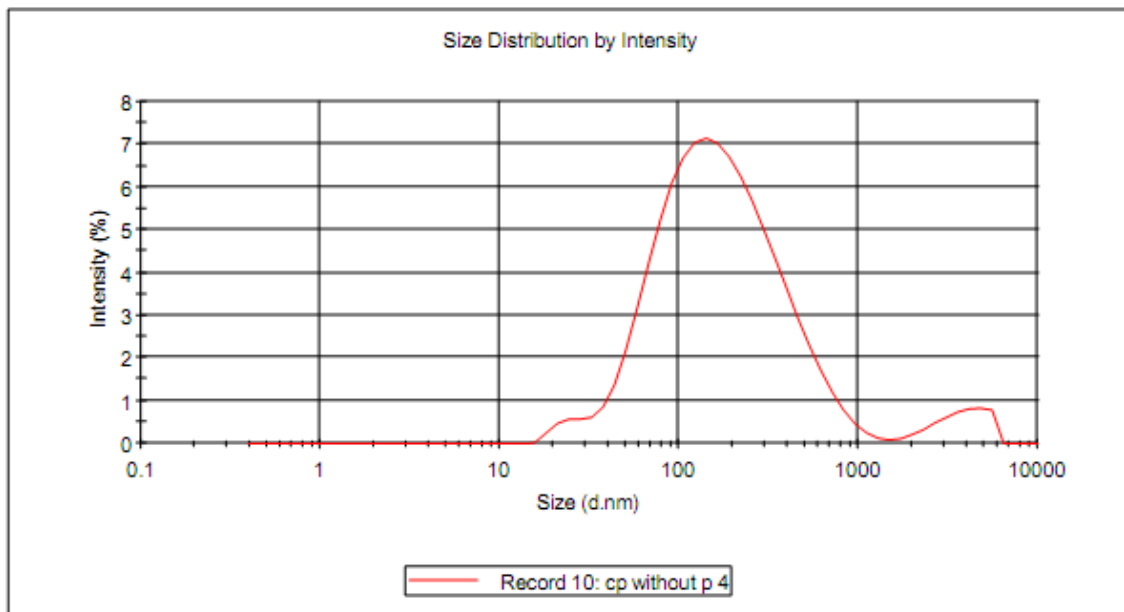

Figure S2 (A) DLS data for SLNs without paliperidone

**Z-Average (d.nm):** 158.9      **Peak 1:** 193.6      **% Intensity:** 87.0      **Width (d.nm):** 117.6  
**PdI:** 0.431      **Peak 2:** 3274      **% Intensity:** 13.0      **Width (d.nm):** 1262  
**Intercept:** 0.918      **Peak 3:** 0.000      **% Intensity:** 0.0      **Width (d.nm):** 0.000

**Result quality :** Good

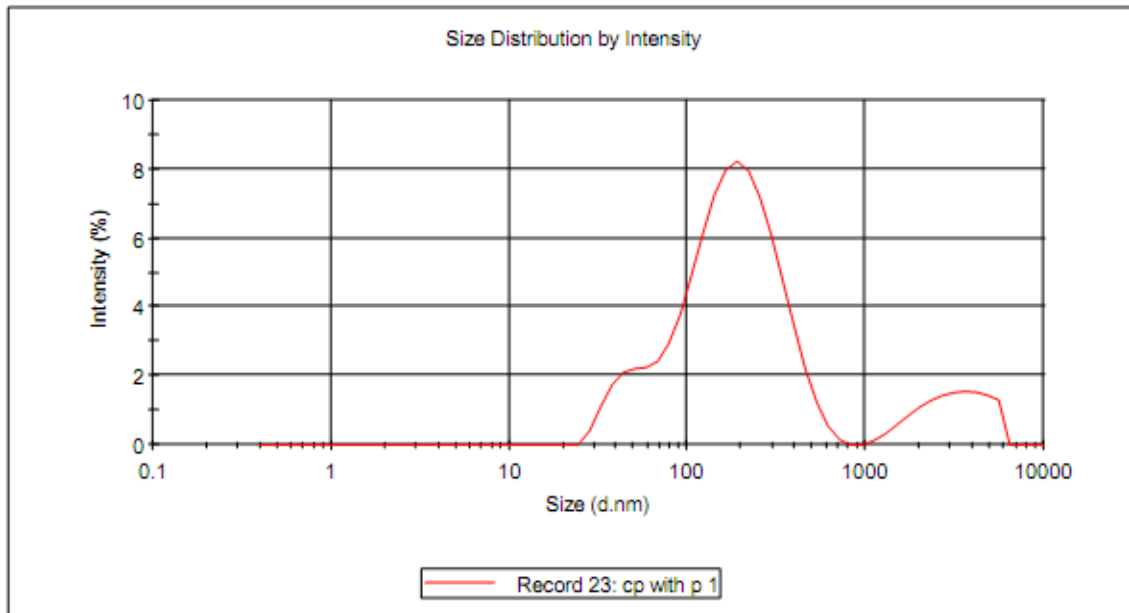

**Figure S2 (B) DLS data for the Paliperidone loaded SLNs**
